# Supplementary material for: 2-(2-Hydroxyphenyl)imidazole-based four-coordinate organoboron compounds with efficient deep blue photoluminescence and electroluminescence
Source: Royal Society of Chemistry journal article supplement (doi:10.1039/c7dt03702c), 2017-11-22
Supplement: c7dt03702c1.pdf [file c7dt03702c1.pdf]

## SUPPORTING INFORMATION

### **2-(2-Hydroxyphenyl)imidazole-based four-coordinate organoboron compounds with efficient deep blue photoluminescence and electroluminescence**

Zhenyu Zhang <sup>a</sup>, Zuolun Zhang,<sup>\*b</sup> Hongyu Zhang<sup>b</sup> and Yue Wang <sup>b</sup>

<sup>a</sup> State Grid Shanxi Electric Power Research Institute, Taiyuan 030001, P. R. Chin

<sup>b</sup> State Key Laboratory of Supramolecular Structure and Materials, College of Chemistry, Jilin University, Changchun 130012, P. R. China

E-mail: zuolunzhang@jlu.edu.cn

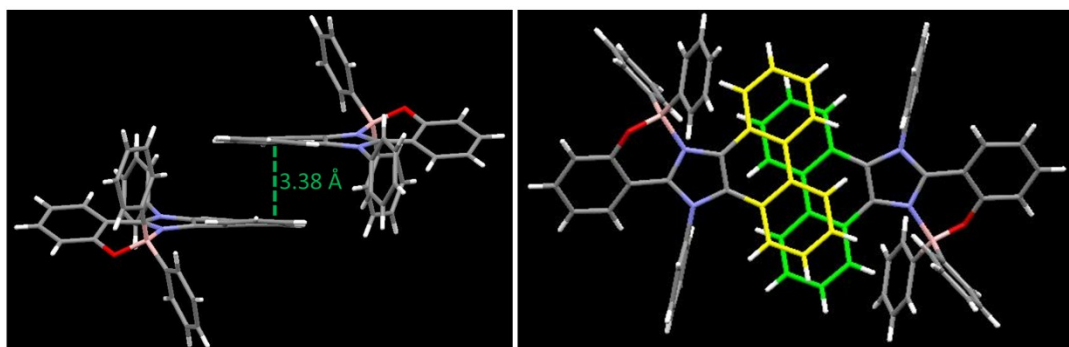

**Fig. S1** The distance (left) and overlapping area (right) of the  $\pi\cdots\pi$  interactions observed in the crystal of **3**.

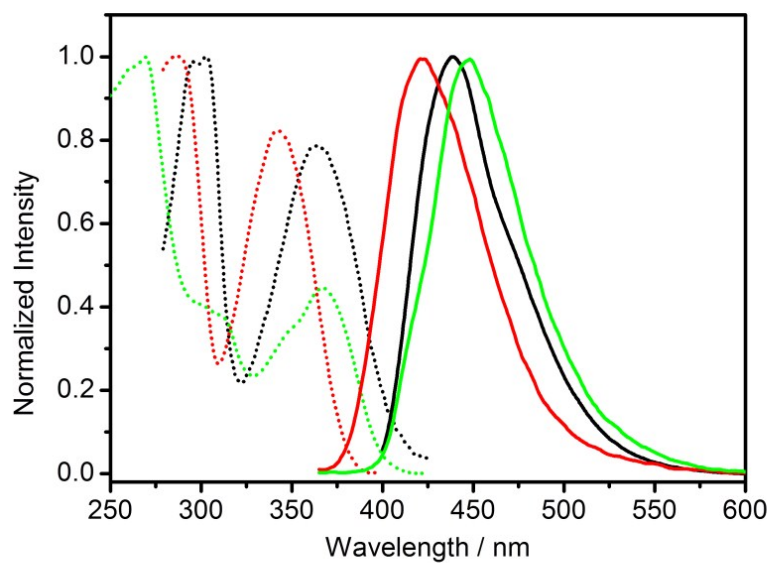

**Fig. S2** Normalized absorption (dashed lines) and emission (solid lines) spectra of **1** (black), **2** (red) and **3** (green) measured with thin films. The spectra of **1** were reported previously, and they are given here for a clear comparison.

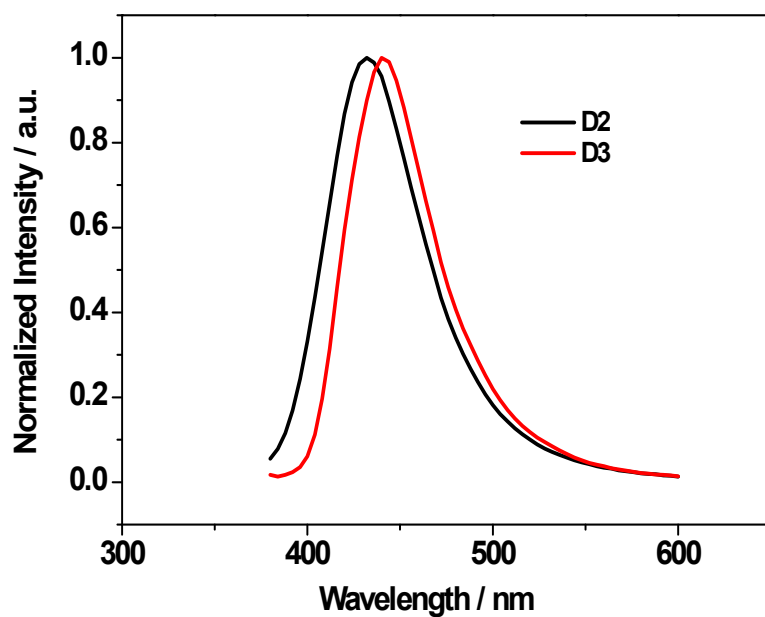

Fig. S3 EL spectra of devices **D2** and **D3** recorded at 100 cd/m<sup>2</sup>.

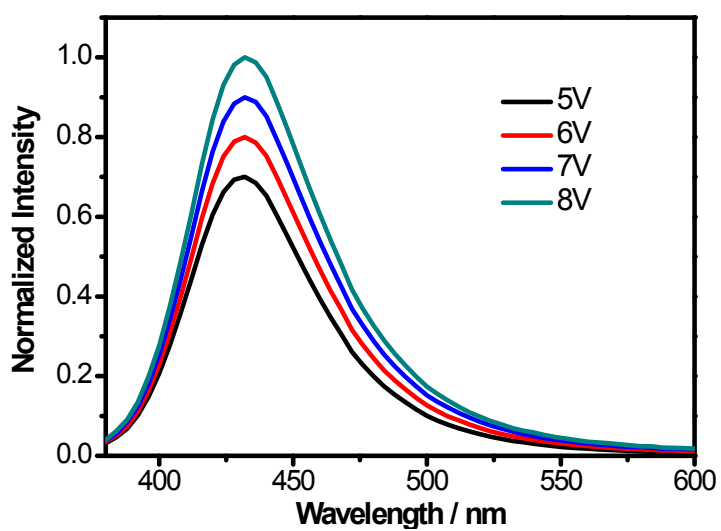

Fig. S4 EL spectra of device **D2** recorded at different driving voltages.

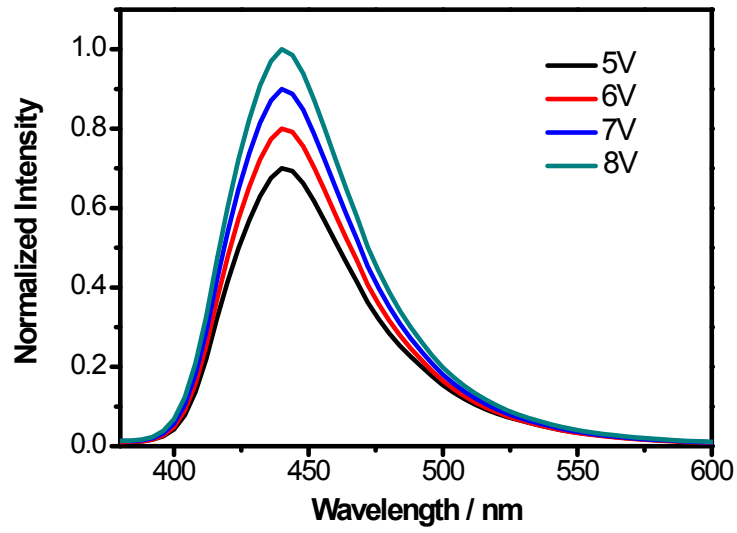

Fig. S5 EL spectra of device D3 recorded at different driving voltages.

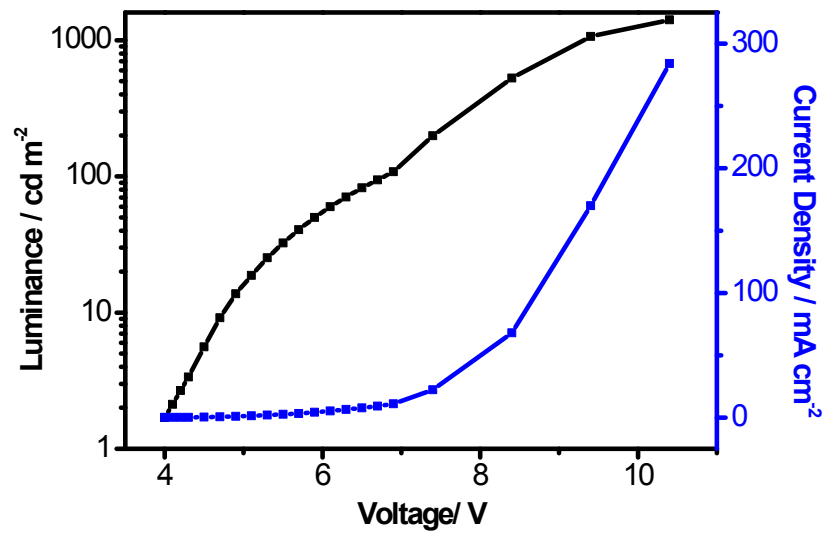

Fig. S6 The luminance-voltage-current density characteristics of device D2.

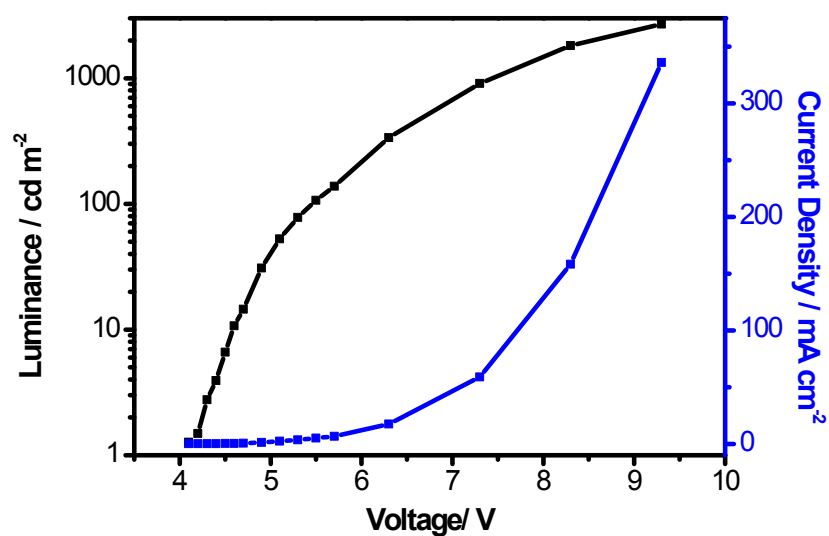

Fig. S7 The luminance-voltage-current density characteristics of device D3.

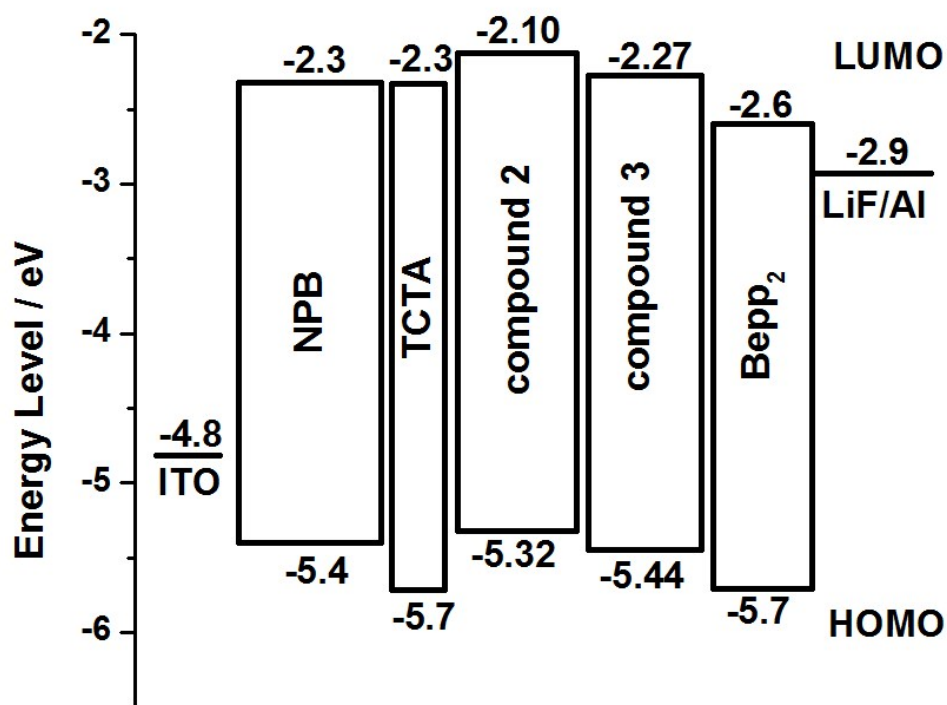

Fig. S8 Energy level diagram for the EL devices.

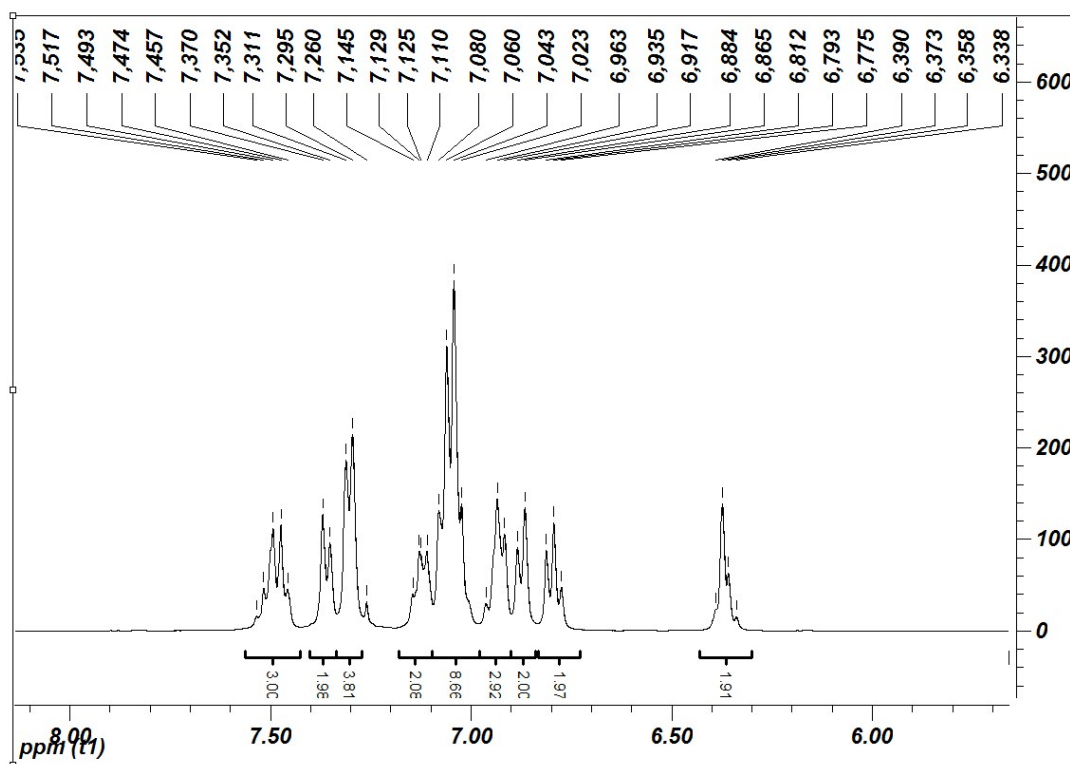

Fig. S9  $^1\text{H}$  NMR spectrum of compound **2** measured in  $\text{CDCl}_3$  (400 MHz).

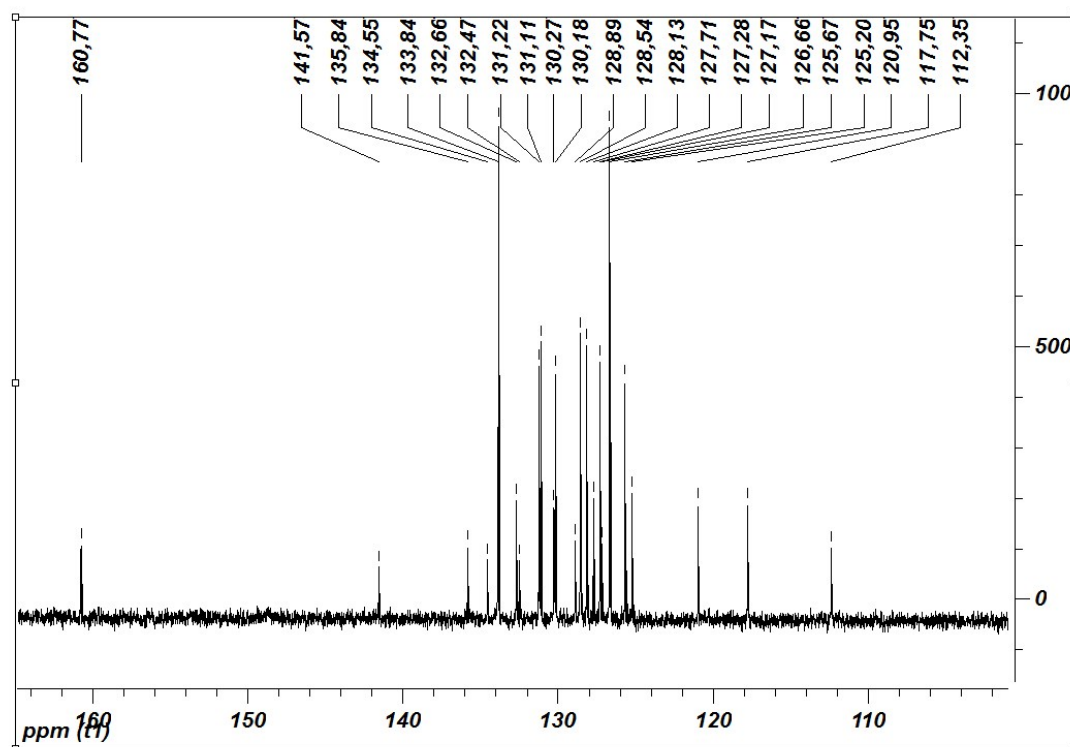

Fig. S10  $^{13}\text{C}\{^1\text{H}\}$  NMR spectrum of compound **2** measured in  $\text{CDCl}_3$  (100 MHz).

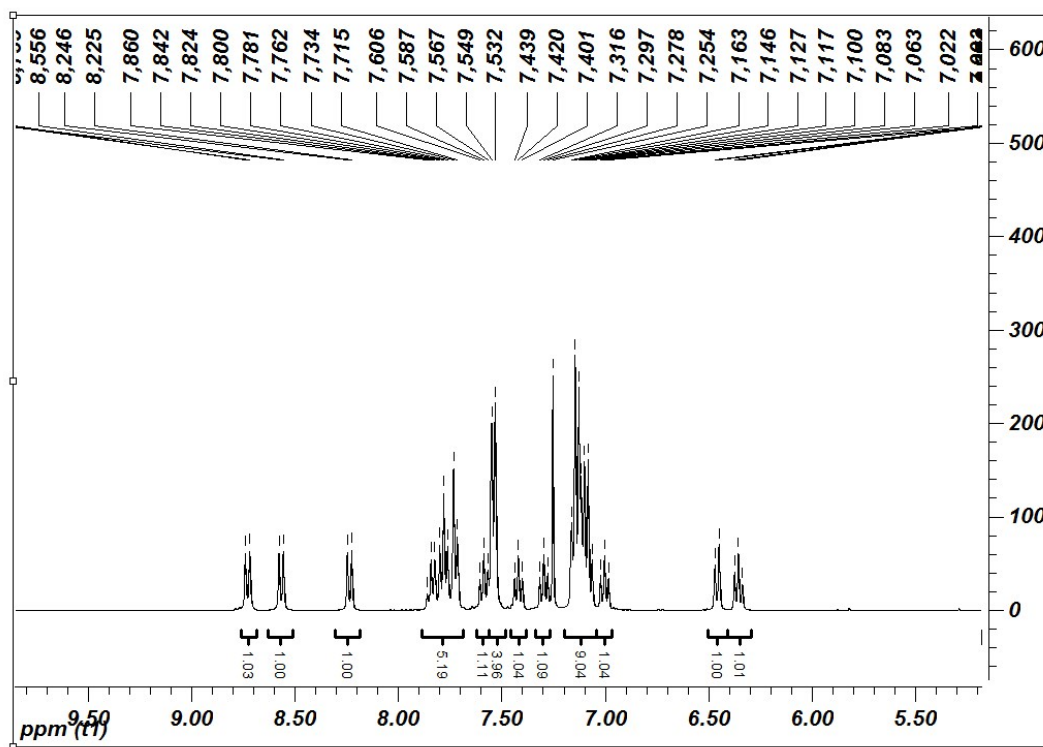

Fig. S11  $^1\text{H}$  NMR spectrum of compound **3** measured in  $\text{CDCl}_3$  (400 MHz).

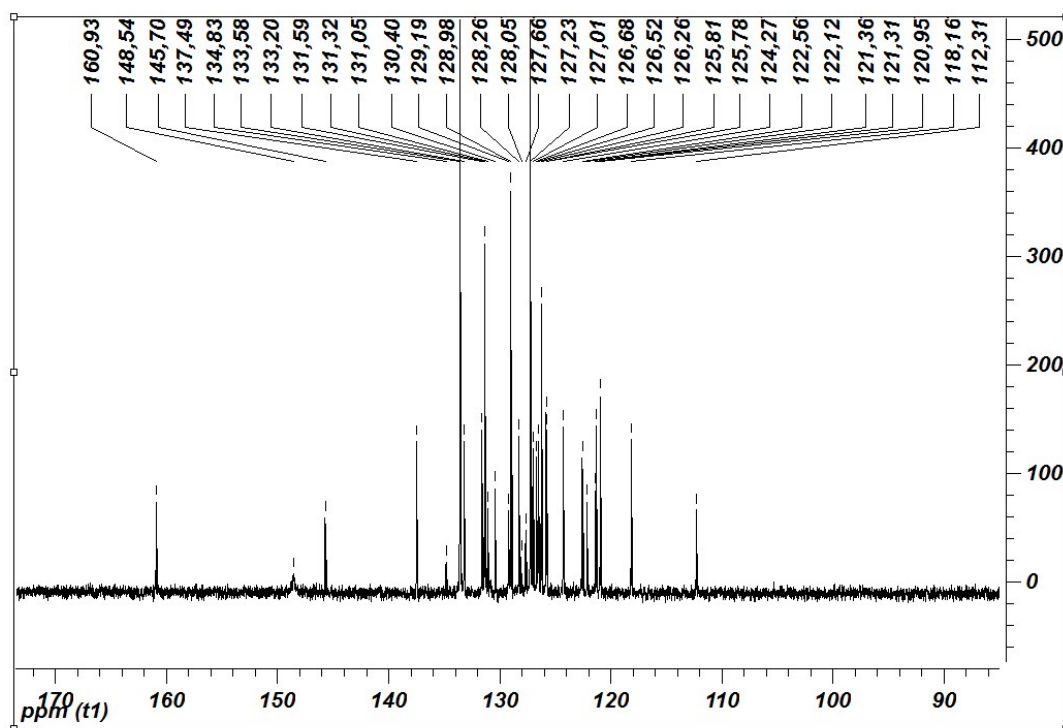

Fig. S12  $^{13}\text{C}\{^1\text{H}\}$  NMR spectrum of compound **3** measured in  $\text{CDCl}_3$  (100 MHz).

**Table S1** Crystal data for **2** and **3**.

|                                                   | <b>2</b>                                          | <b>3</b>                                          |
|---------------------------------------------------|---------------------------------------------------|---------------------------------------------------|
| chemical formula                                  | C <sub>39</sub> H <sub>29</sub> BN <sub>2</sub> O | C <sub>39</sub> H <sub>27</sub> BN <sub>2</sub> O |
| formula weight                                    | 552.45                                            | 550.44                                            |
| temperature                                       | 293(2)                                            | 293(2)                                            |
| radiation                                         | MoK $\alpha$ ( $\lambda$ = 0.71073)               | MoK $\alpha$ ( $\lambda$ = 0.71073)               |
| crystal system                                    | triclinic                                         | Monoclinic                                        |
| space group                                       | P-1                                               | P2(1)/n                                           |
| <i>a</i> (Å)                                      | 10.144(2)                                         | 9.4745(19)                                        |
| <i>b</i> (Å)                                      | 11.510(2)                                         | 16.609(3)                                         |
| <i>c</i> (Å)                                      | 14.188(3)                                         | 18.798(4)                                         |
| $\alpha$ (deg)                                    | 77.15(3)                                          | 90.00                                             |
| $\beta$ (deg)                                     | 77.52(3)                                          | 99.49(3)                                          |
| $\gamma$ (deg)                                    | 69.49(3)                                          | 90.00                                             |
| <i>V</i> (Å <sup>3</sup> )                        | 1495.1(5)                                         | 2917.6(10)                                        |
| <i>Z</i>                                          | 2                                                 | 4                                                 |
| calculated density (g cm <sup>-3</sup> )          | 1.227                                             | 1.253                                             |
| F(000)                                            | 580                                               | 1152                                              |
| $\theta$ range (deg)                              | 3.14–27.48                                        | 3.08–24.99                                        |
| reflections collected                             | 14740                                             | 19865                                             |
| independent reflections                           | 6776                                              | 4933                                              |
| reflections [ <i>I</i> > 2 $\sigma$ ( <i>I</i> )] | 4569                                              | 2659                                              |
| GOF                                               | 1.053                                             | 1.007                                             |
| R1/WR2 [ <i>I</i> > 2 $\sigma$ ( <i>I</i> )]      | 0.0505/0.1233                                     | 0.0658/0.1686                                     |
| R1/WR2 (all data)                                 | 0.0756/0.1336                                     | 0.1297/0.2146                                     |



**Table S2.** Photophysical data of compounds **1–3**.

| Compound              | media                           | $\lambda_{\text{abs}} / \text{nm}$ | $\lambda_{\text{em}} / \text{nm}$ | $\Phi_{\text{F}}$ |
|-----------------------|---------------------------------|------------------------------------|-----------------------------------|-------------------|
| <b>1</b> <sup>a</sup> | CH <sub>2</sub> Cl <sub>2</sub> | 356                                | 435                               | 0.73              |
|                       | thin film                       | 363                                | 440                               | 0.47              |
| <b>2</b>              | CH <sub>2</sub> Cl <sub>2</sub> | 341                                | 423                               | 0.64              |
|                       | thin film                       | 341                                | 421                               | 0.52              |
| <b>3</b>              | CH <sub>2</sub> Cl <sub>2</sub> | 333, 364                           | 469                               | 0.69              |
|                       | thin film                       | 367                                | 448                               | 0.60              |

<sup>a</sup> The data for compound **1** are previously reported by us (*Inorg. Chem.* 2015, 54, 2652.)
